# Supplementary material for: Synthesis, thermophysical characterization and thermal performance analysis of novel Cu-MXene hybrid nanofluids for efficient coolant applications
Source: Royal Society of Chemistry journal article supplement (doi:10.1039/d3ra05429b), 2023-01-01
Supplement: d3ra05429b1.pdf [file d3ra05429b1.pdf]

# Synthesis, thermophysical characterization and thermal performance analysis of novel Cu-MXene hybrid nanofluids for efficient coolant applications

Kodi Rajesh Kumar and Aabid hussain Shaik\*

Colloids and Polymers Research Group

School of Chemical Engineering

Vellore Institute of Technology, Vellore, Tamilnadu-632014

Corresponding author email: [aabidhussain.s@vit.ac.in](mailto:aabidhussain.s@vit.ac.in)

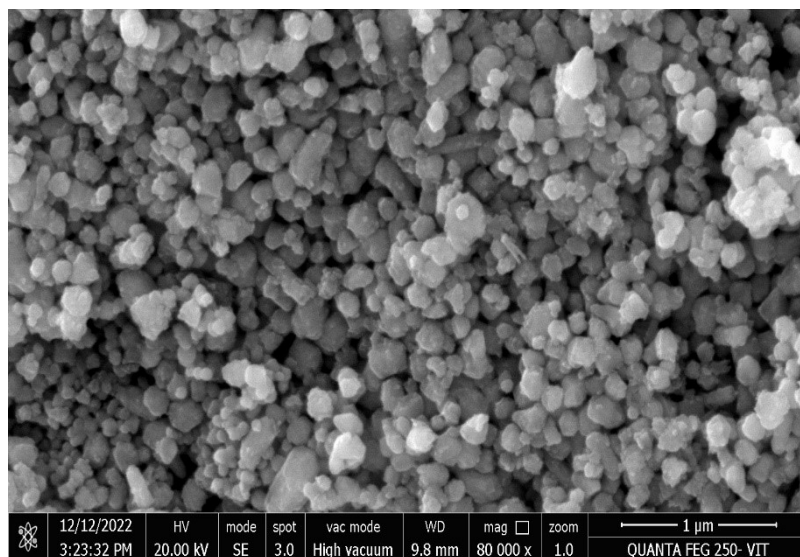

**Fig. S1:** SEM image of Cu nanoparticles

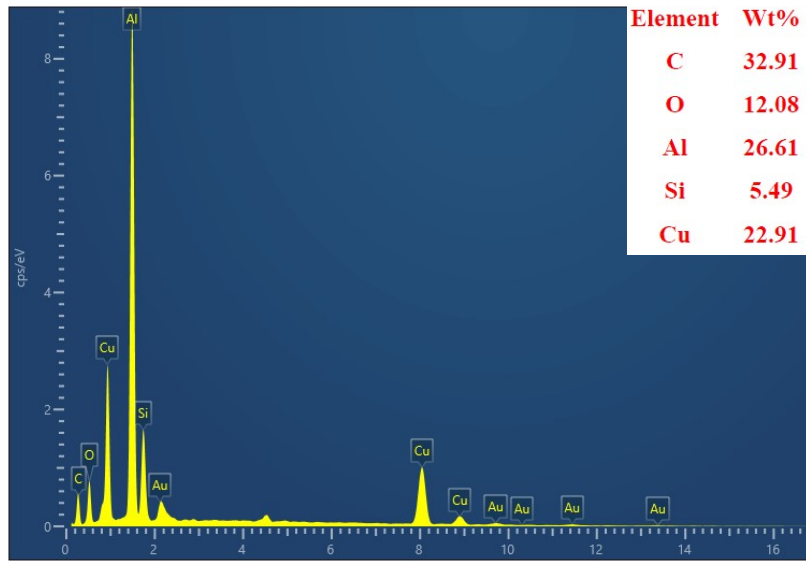

**Fig. S2:** EDX image of Cu nanoparticles. Inset of the figure represents elemental composition (wt.%) in table form.

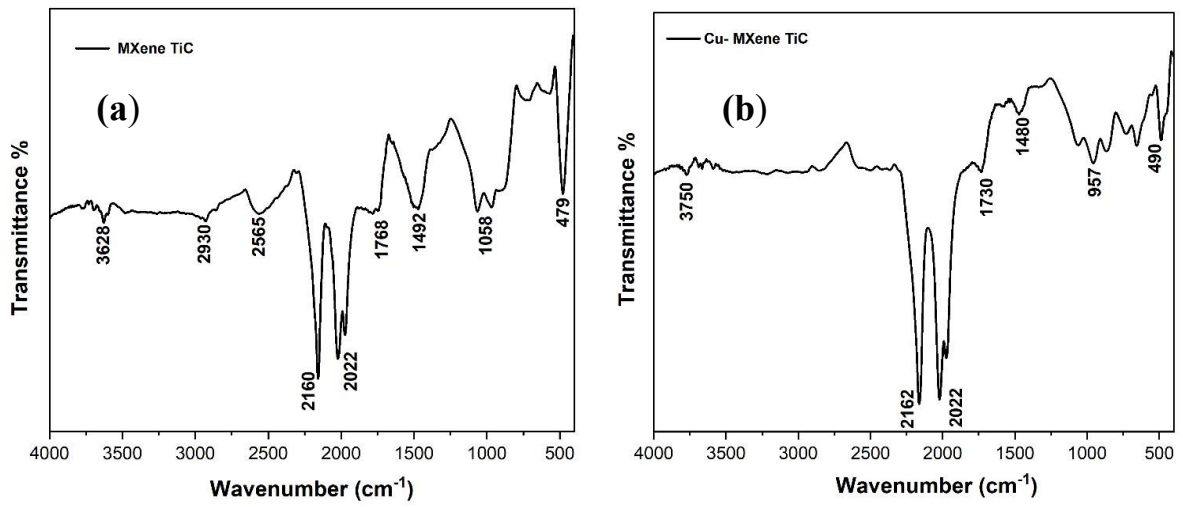

**Fig. S3:** FTIR spectra of (a) MXene and (b) Cu-MXene nanostructures
